# Supplementary material for: Genome-wide polymorphism and genic selection in feral and domesticated lineages of Cannabis sativa
Source: PubMed Central journal article supplement (PMC9911069; doi:10.1093/g3journal/jkac209), 2022-08-26
Supplement: jkac209_supplemental_figures.pdf [file jkac209_supplemental_figures.pdf]

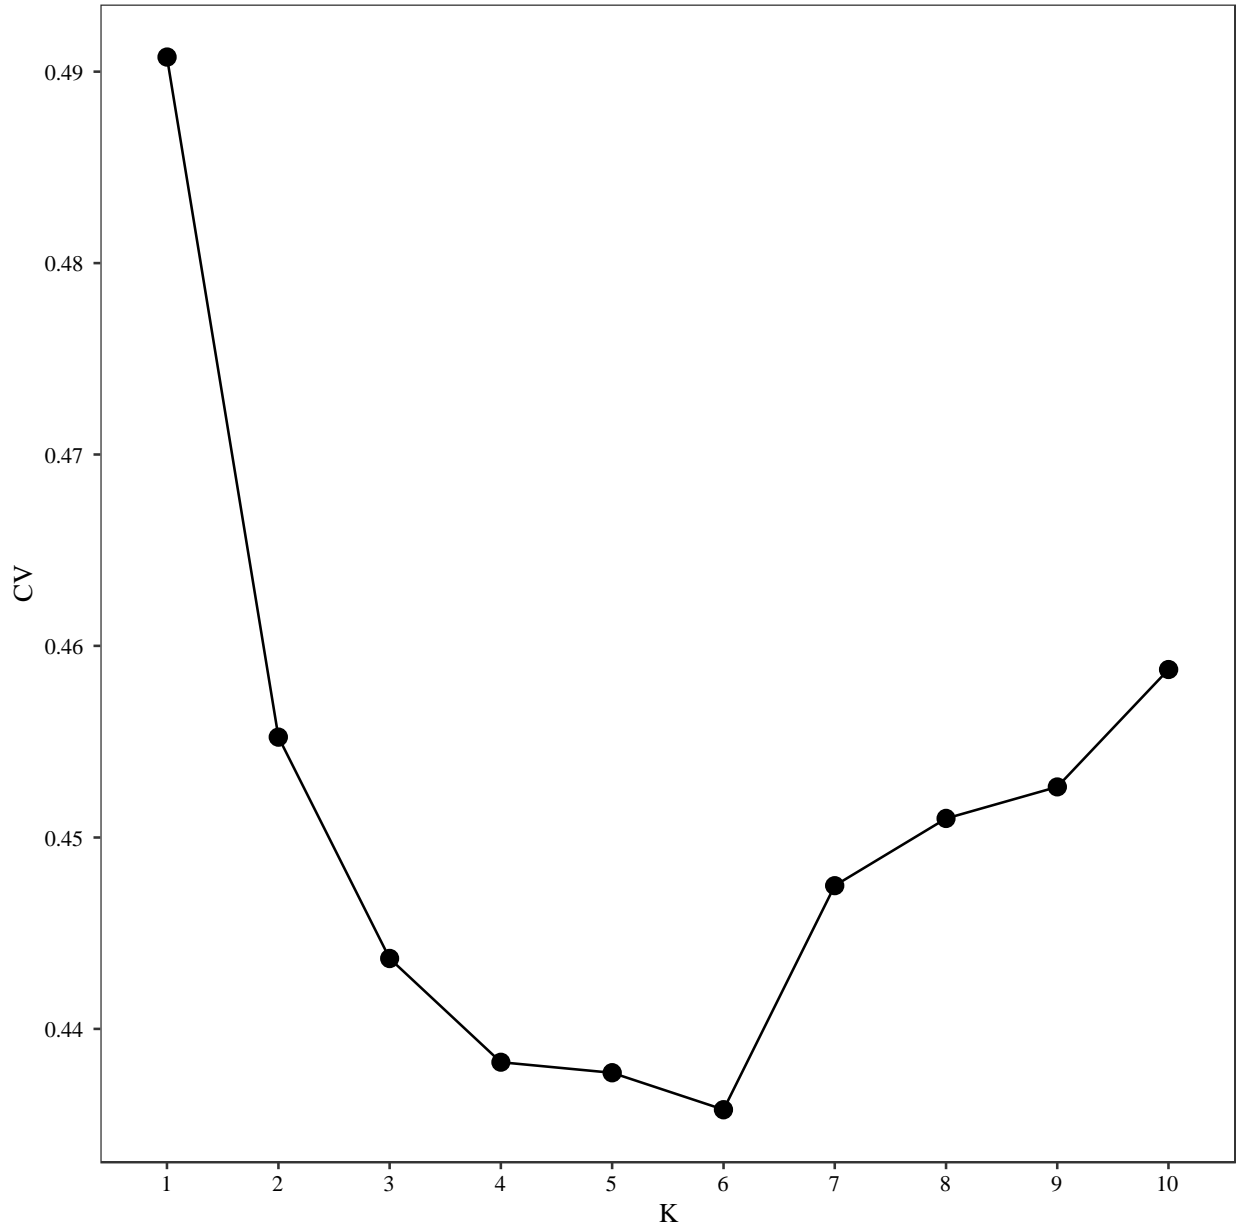

1 **Supplemental Figure 1.** Cross validation (CV) errors calculated by ADMIXTURE for K values  
2 1-10. K = 6 exhibited the lowest cross validation error.

3  
4  
5  
6  
7  
8  
9  
10  
11  
12

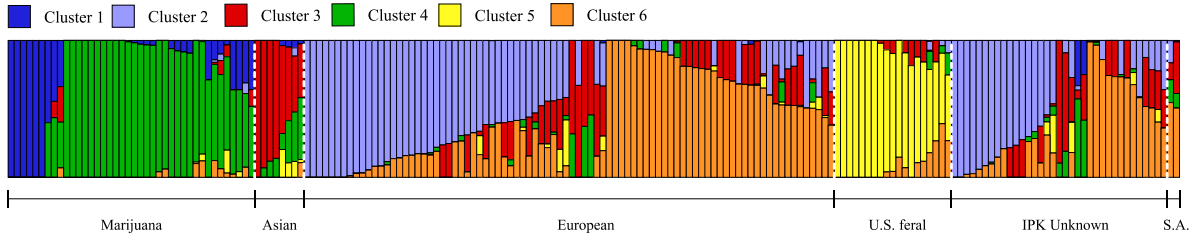

13 **Supplemental Figure 2.** Stacked bar plots representing ADMIXTURE results showing individual  
14 ancestry likelihoods assuming  $K = 6$ .  
15  
16  
17

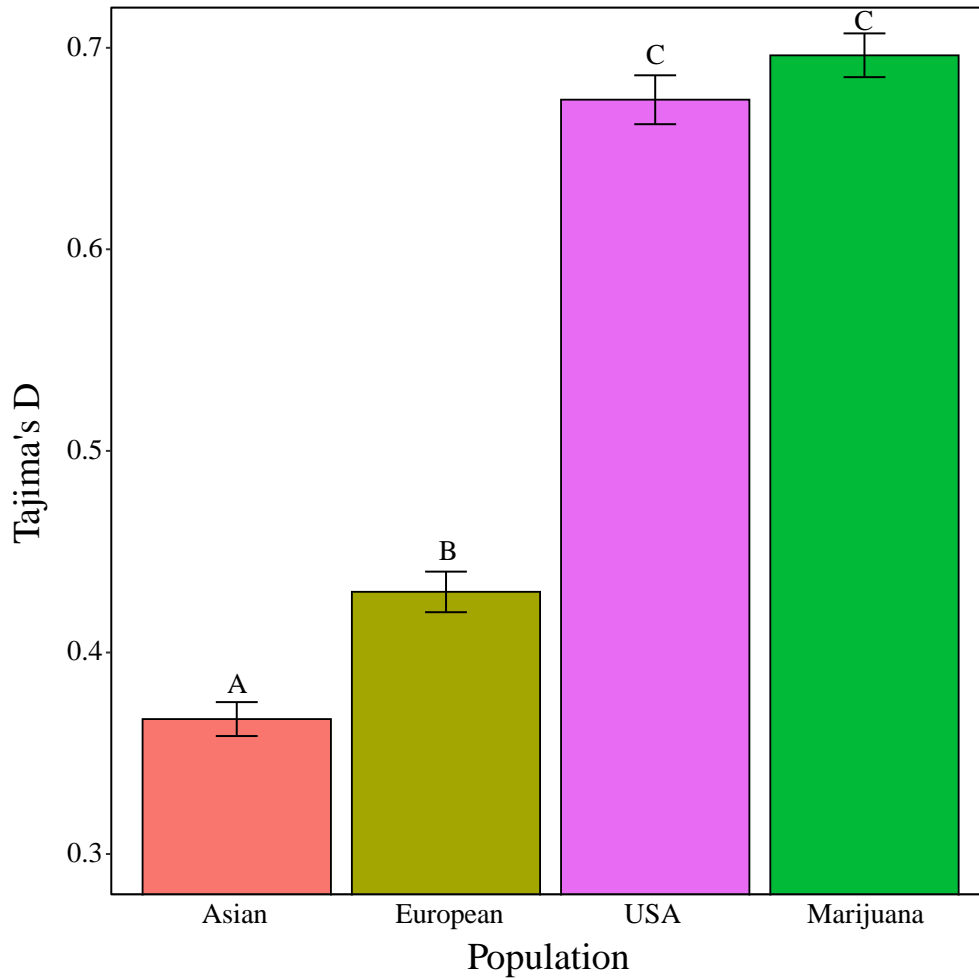

18  
19  
20  
21  
22  
23  
24  
25  
26  
27  
28  
29  
30  
31  
32  
33  
34  
35  
36  
37  
38  
39  
40  
41  
42  
43  
44  
45 **Supplemental Figure 3.** Bar plots showing the comparisons of mean Tajima's D ( $\pm$  standard  
46 error) across the Asian, European, U.S. feral and Marijuana sub-populations at the 7540 single  
47 copy orthologs. Letters above bars indicate significance of Tukey adjusted post-hoc pairwise  
48 comparisons such that different letters indicate significant differences ( $p < 0.05$ ).  
49  
50  
51

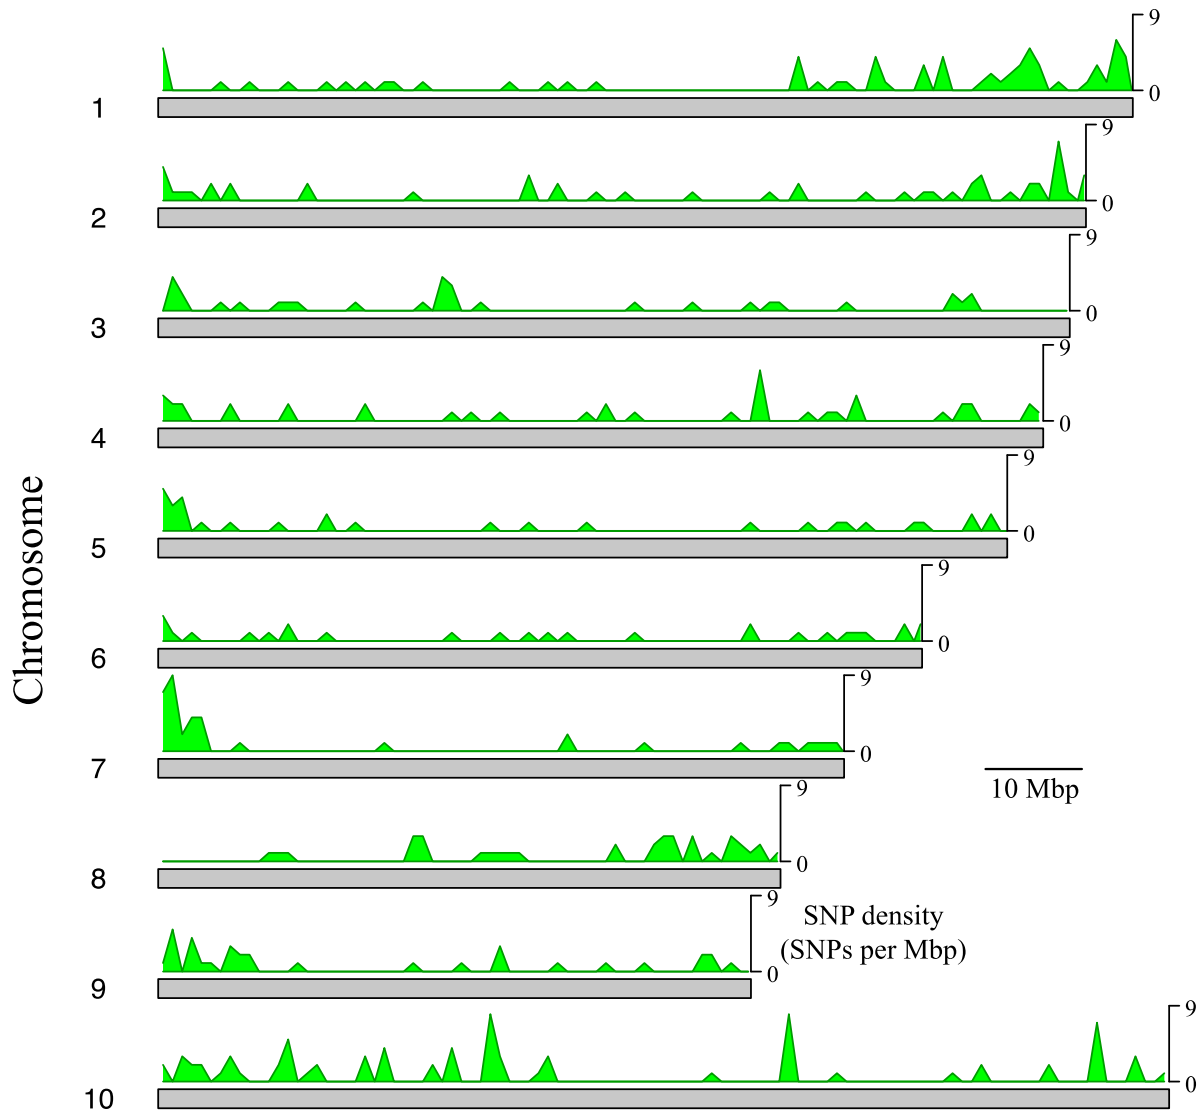

52 **Supplemental Figure 4.** SNP density plot depicting the locations of derived alleles showing  
53 evidence for species wide selection. Shown are horizontal grey bars representing the ten *C. sativa*  
54 chromosomes with local green density plots that depict the number of species wide high frequency  
55 derived alleles in 1 megabase intervals.

56  
57  
58  
59  
60  
61  
62  
63  
64  
65

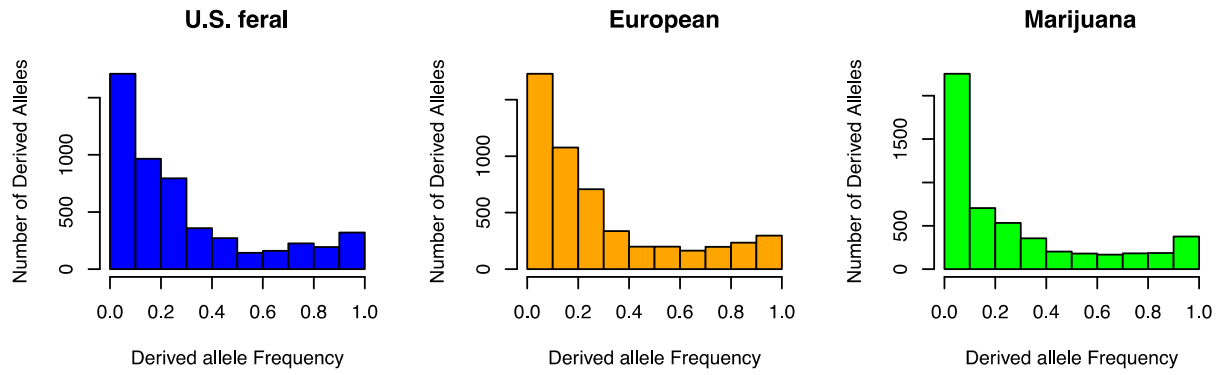

66 **Supplemental Figure 5.** Individual derived allele frequency spectrums for the U.S. feral,  
67 European and Marijuana sub-populations respectively.

68  
69  
70  
71  
72  
73  
74  
75  
76  
77  
78  
79  
80  
81  
82  
83  
84  
85  
86  
87  
88  
89  
90  
91  
92  
93  
94  
95  
96  
97  
98  
99  
100
